# Supplementary material for: One-minute self-assembly of millimetre-long DAST crystalline microbelts via substrate-supported rapid evaporation crystallization
Source: Royal Society of Chemistry journal article supplement (doi:10.1039/c7ra04912a), 2017-01-01
Supplement: c7ra04912a1.pdf [file c7ra04912a1.pdf]

## One-minute self-assembly of millimetre-long DAST crystalline microbelts via substrate-supported rapid evaporation crystallization

Tian Tian, Bin Cai<sup>1\*</sup>, Tianming Ye<sup>1</sup>, QingQing Cheng<sup>1</sup>, Peng Zhan<sup>1</sup>, Gongjie Xu<sup>1</sup>, Ling Zhang<sup>1</sup> and Okihiko Sugihara<sup>2</sup>

<sup>1</sup>Shanghai Key Lab of Modern Optical System and Engineering Research Center of Optical Instrument and System, Ministry of Education, University of Shanghai for Science and Technology, Shanghai 200093, China, <sup>2</sup>Graduate School of Engineering, Utsunomiya University, Utsunomiya 321-8585, Japan

### DAST crystalline microbelts preparation by RGA-8 surfactant.

0.15 mM DAST methanol solution was mixed with a polymer-type surfactant RGA-8 (PARAPLEX® RGA-8, Hallstar, Acid value: 2.0) (weight ratio of DAST to surfactant is 1: 20). To make RGA-8 dissolve well into methanol, the mixture was stirred 4 hours fiercely. Then the mixed solution was immediately dripped onto a 145 °C heated hydrophilic glass substrate. As the methanol rapidly evaporated, plenty of DAST crystalline MBs formed immediately.

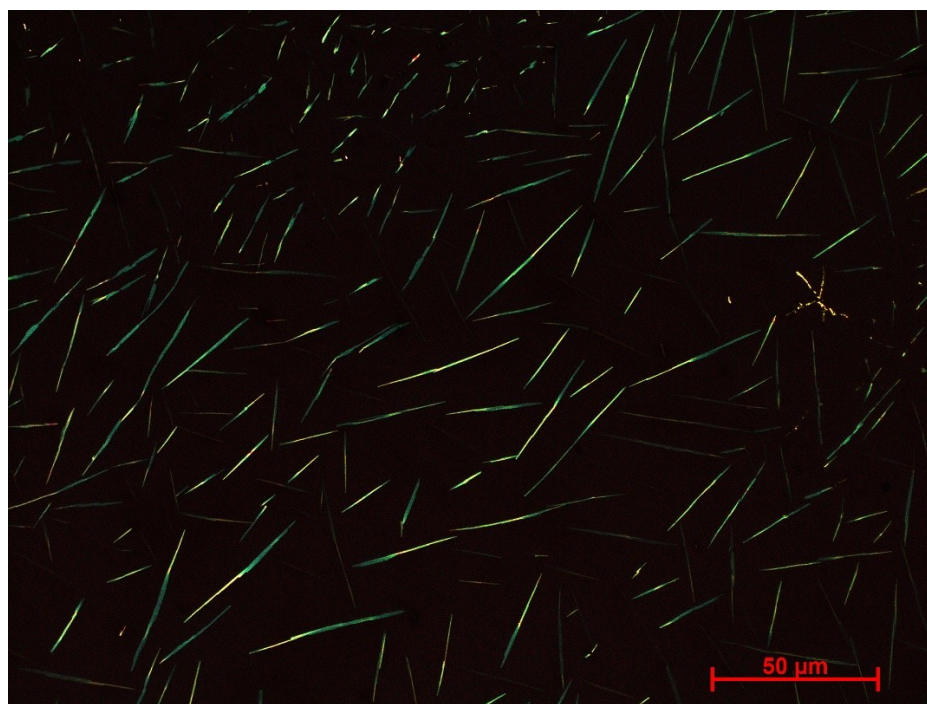

Figure S1 microscopy image of DAST crystalline MBs prepared by using low acid value surfactant RGA-8
